# Supplementary material for: In Vivo Pre-Instructed HSCs Robustly Execute Asymmetric Cell Divisions In Vitro
Source: MDPI journal article supplement (doi:10.3390/ijms21218225), 2020-11-03
Supplement: s1 [file s1]

## Supplementary Figures:

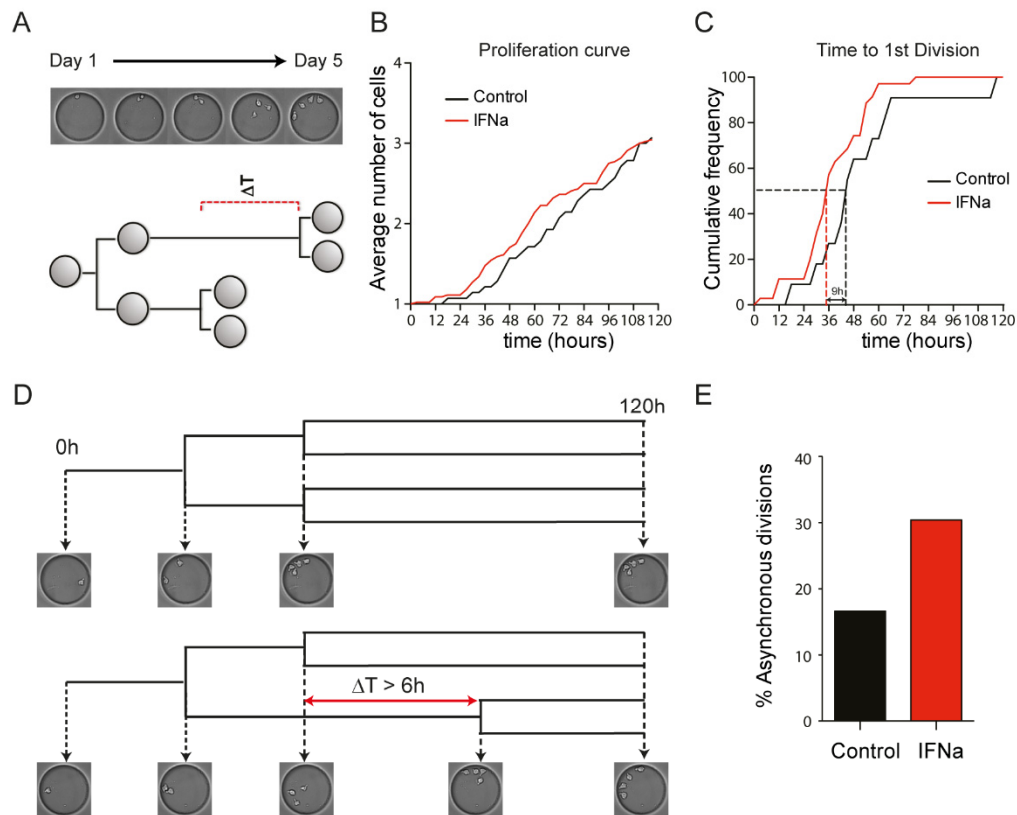

**Figure S1.** In vivo activation of HSCs by IFN $\alpha$  increases asynchronous cell divisions. **(A)** Single cell proliferation kinetics analysis using live cell imaging of HSCs in PEG microwells. **(B-C)** Proliferation kinetics of HSCs isolated from control and IFN $\alpha$  administered mice. The average proliferation over 5 days remains similar in the two conditions, with IFN $\alpha$  activated cells carrying out the first division much faster ( $\sim 9$ h) as compared to control HSCs. **(D)** Representative example of synchronous division (top) and an asynchronous division (below) with  $\Delta T$  6 hours being used as a threshold. **(E)** IFN $\alpha$  activated HSCs show an increase in the proportion of asynchronous divisions.

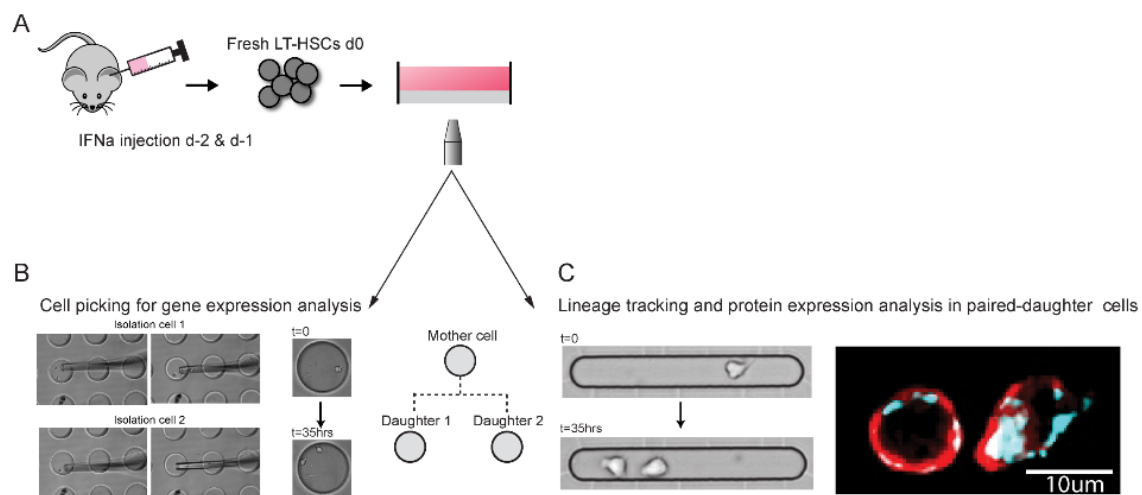

**Figure S2.** Gene and protein analysis of PDCs from IFNa-activated HSCs. (A) Freshly isolated HSC were cultured onto PEG microwells (B) or pHEMA-TMPTMA micro-grooves (C) and allowed to carry out a division. (B) Micromanipulation of paired daughter cells (PDCs) generated from a single HSC after one division, for multi-gene expression analysis using PEG microwell platform. (C) Protein expression analysis of PDCs generated from a single HSC after one division using pHEMA-TMPTMA micro-groove platform.

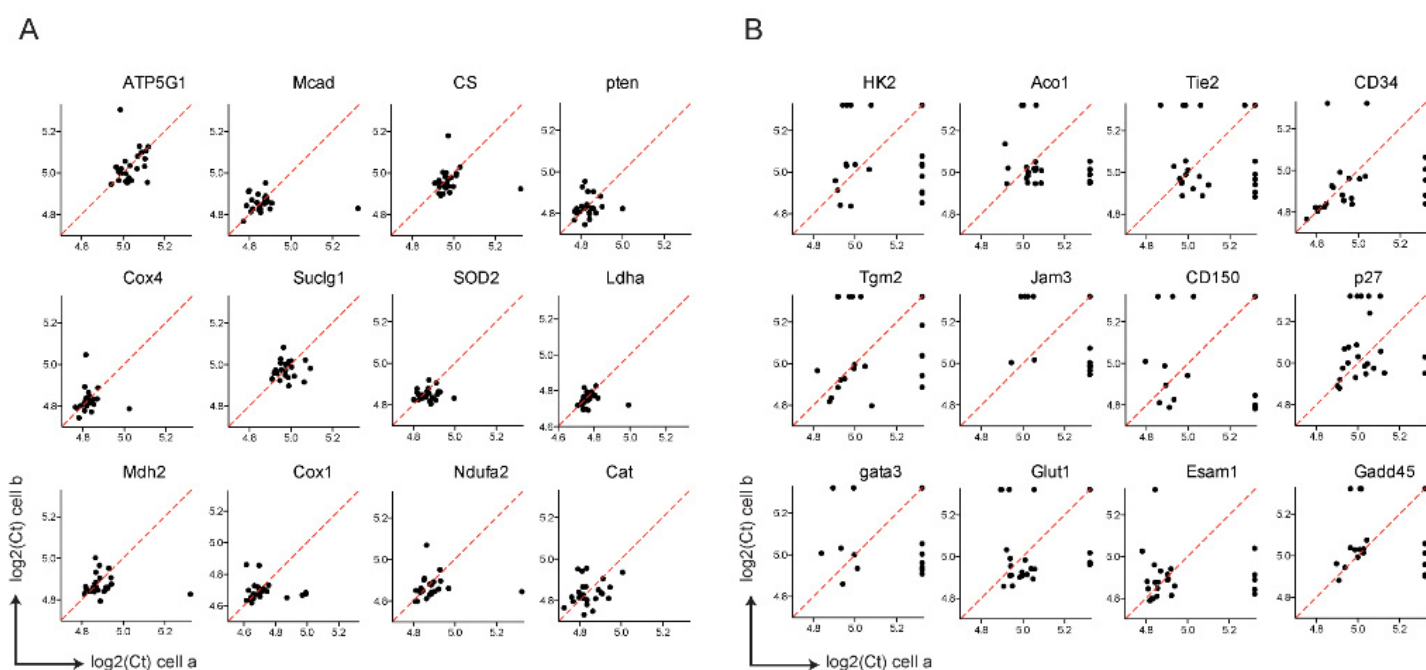

**Figure S3.** Qualitative analysis of distribution of gene expression in PDCs. Each gene is shown for the expression of 24 pairs of cells, with each dot representing a pair. **(A)** Representative examples of genes showing symmetric expression across most pairs. Most pairs appear close to the “symmetric diagonal” (in red). **(B)** Representative examples of genes showing asymmetric expression in pair daughter cells. Most pairs appearing far away from the “symmetric diagonal” (in red). Interestingly most of these genes have a subpopulation of pairs that show symmetric behaviour.

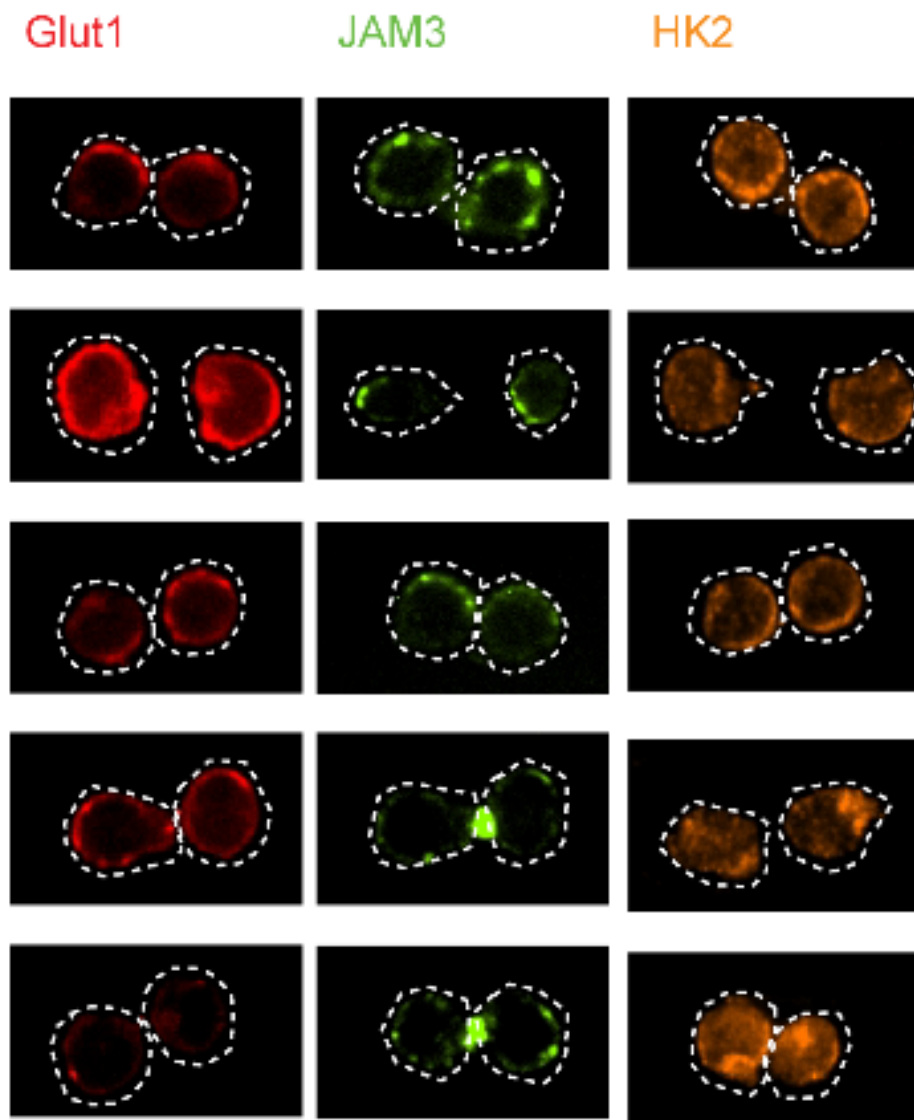

**Figure S4.** Representative examples of symmetric expression of Glut1, JAM3 and HK2 in paired daughter cell pairs.
